# Supplementary material for: Mesenchymal Stem Cell‐Derived Microvesicles Support Ex Vivo Expansion of Cord Blood‐Derived CD34+ Cells
Source: Hindawi journal article supplement (doi:10.1155/2016/6493241), 2016-01-01
Supplement: f1 [file 6493241.f1.pdf]

## Supporting Information

### **Mesenchymal stem cell-derived microvesicles support ex vivo expansion of cord blood-derived CD34<sup>+</sup> cells**

**Hui Xie<sup>1\*</sup>, Li Sun<sup>2\*</sup>, Liming Zhang<sup>3</sup>, Teng Liu<sup>4</sup>, Li Chen<sup>5</sup>, Aiqi Zhao<sup>1</sup>, Qian Lei<sup>1</sup>, Fei Gao<sup>1</sup>, Qiubai Li<sup>1</sup>, Anyuan Guo<sup>4</sup>, Zhichao Chen<sup>1</sup>, Hongxiang Wang<sup>5</sup>**

*<sup>1</sup>Institute of Hematology, Union Hospital, Tongji Medical College, Huazhong University of Science and Technology, Wuhan 430022, P. R. China*

*<sup>2</sup>Department of Hematology, the Second Hospital of Hebei Medical University, Shijiazhuang 050000, P. R. China*

*<sup>3</sup>Department of Hematology, the Central Hospital of Jingzhou, Jingzhou 434020, P. R. China*

*<sup>4</sup>Department of Biomedical Engineering, College of Life Science and Technology, Huazhong University of Science and Technology, Wuhan 430074, P. R. China*

*<sup>5</sup>Department of Hematology, the Central Hospital of Wuhan, Wuhan 430012, P. R. China*

Correspondence should be addressed to: Zhichao Chen, [chenzhichao@hust.edu.cn](mailto:chenzhichao@hust.edu.cn); and Hongxiang Wang, [whitely1972@sina.com](mailto:whitely1972@sina.com).

\*These authors contributed equally to this work.

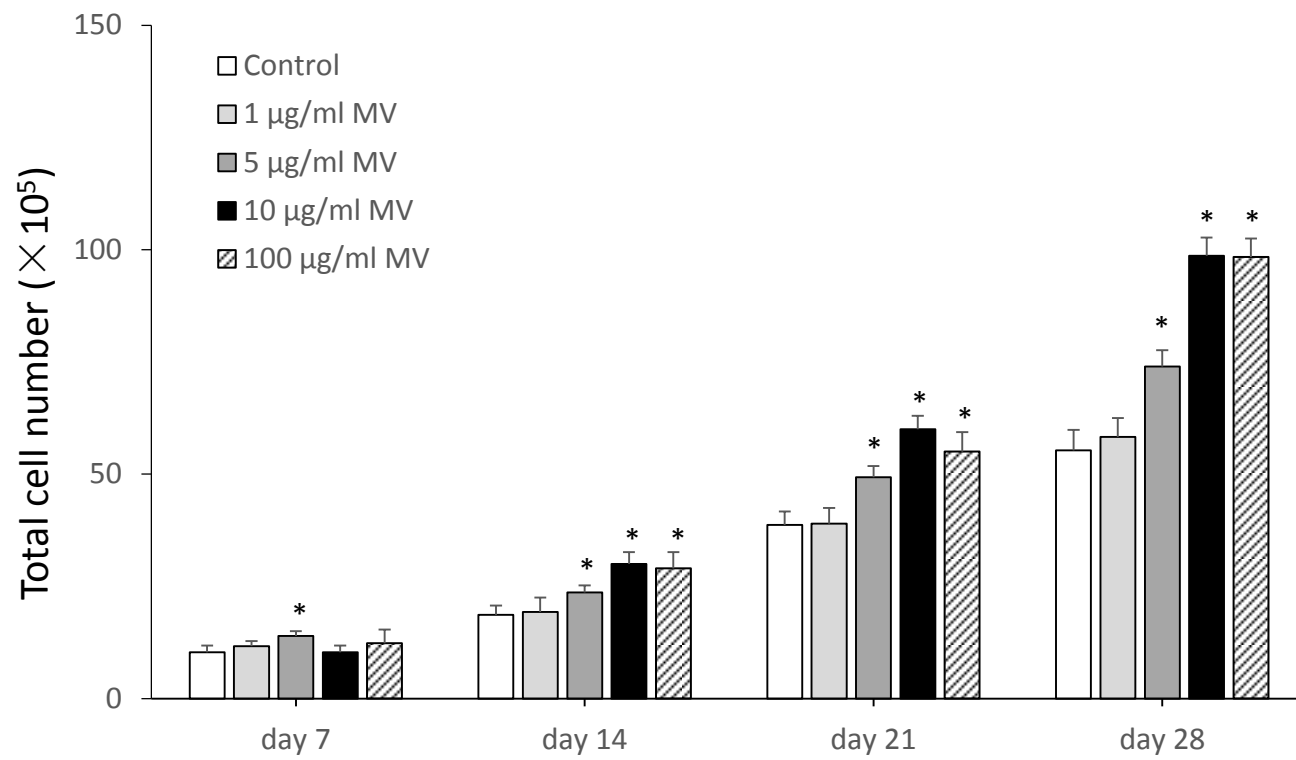

Figure S1: Ex vivo expansion of CB-MNCs with different concentrations of MSC-MVs. CB-MNCs were maintained under five different culture conditions: control, 1 µg/mL MV, 5 µg/mL MV, 10 µg/mL MV and 100 µg/mL MV. Growth profile of TNCs (n = 3), \*p < 0.05 compared with the control.

**Table S1:** miRNAs expressed in MSC-MVs. The expression levels of miRNAs were calculated as the base 2 logarithm of the nominalized signals.

| miRNAs          | expression level |
|-----------------|------------------|
| hsa-miR-4281    | 14.567585        |
| hsa-miR-1207-5p | 13.745852        |
| hsa-miR-1225-5p | 13.164646        |
| hsa-miR-1202    | 12.991837        |
| hsa-miR-2861    | 12.682714        |
| hsa-miR-638     | 12.50079         |
| hsa-miR-320c    | 12.329145        |
| hsa-miR-21      | 12.285721        |
| hsv2-miR-H10    | 12.128811        |
| hsa-miR-1275    | 12.089333        |
| hsa-miR-4270    | 12.060837        |
| hsa-miR-762     | 12.006063        |
| hsa-miR-3656    | 11.941285        |
| hsa-miR-1915    | 11.851605        |
| hsa-miR-3665    | 11.754297        |
| hsa-miR-630     | 11.669834        |
| hsa-miR-150*    | 11.546194        |
| hsa-miR-3162    | 11.470816        |
| hsa-miR-3195    | 11.347115        |
| kshv-miR-K12-3  | 11.337478        |
| hsa-miR-4327    | 11.269712        |
| hsa-miR-494     | 11.169283        |
| hsa-miR-451     | 11.166111        |
| hsa-miR-3663-3p | 11.043634        |
| hsa-miR-223     | 11.036649        |
| hsa-miR-1268    | 11.017969        |
| hsa-miR-3679-5p | 10.8913555       |
| hsv2-miR-H6     | 10.864179        |
| hsa-miR-134     | 10.848331        |
| hsa-miR-642b    | 10.780482        |
| hsa-miR-1246    | 10.751949        |
| hsa-miR-188-5p  | 10.640162        |
| hsv1-miR-H17    | 10.603412        |
| hsa-miR-720     | 10.57036         |
| hsa-miR-575     | 10.416153        |
| hsa-miR-3196    | 10.38527         |
| hsa-miR-939     | 10.258823        |
| hsa-miR-663     | 10.169552        |
| hsa-miR-718     | 10.1124935       |

|                  |           |
|------------------|-----------|
| hsa-miR-4286     | 10.078846 |
| hcmv-miR-UL70-3p | 10.053999 |
| hsv2-miR-H25     | 10.006031 |
| hsa-miR-23a      | 9.842035  |
| hsa-miR-940      | 9.708692  |
| hsa-miR-483-5p   | 9.678314  |
| hsa-miR-1471     | 9.655757  |
| hsa-miR-4299     | 9.629159  |
| hsa-miR-22       | 9.550125  |
| hsa-miR-1274b    | 9.482363  |
| hsa-miR-3141     | 9.457193  |
| hsa-miR-572      | 9.376527  |
| hsa-let-7a       | 9.324976  |
| hsv2-miR-H24     | 9.271818  |
| hsv1-miR-H6-5p   | 9.258377  |
| hsa-miR-3198     | 9.251155  |
| hsa-miR-29a      | 9.216732  |
| hsa-miR-1224-5p  | 9.164385  |
| hsv2-miR-H22     | 9.136539  |
| hsa-miR-16       | 9.10329   |
| hsa-miR-4298     | 9.059471  |
| kshv-miR-K12-7*  | 9.049791  |
| ebv-miR-BART13   | 9.004726  |
| hsa-let-7f       | 8.997303  |
| hsa-miR-135a*    | 8.951677  |
| hsa-miR-1914*    | 8.949656  |
| hsa-let-7b       | 8.887102  |
| hsa-miR-27a      | 8.864937  |
| hsa-miR-4271     | 8.844454  |
| hsa-miR-513a-5p  | 8.801216  |
| hsa-miR-3138     | 8.75045   |
| hsv1-miR-H18     | 8.707052  |
| hsa-miR-3188     | 8.669894  |
| hsa-miR-125b     | 8.647974  |
| hsa-miR-3667-5p  | 8.6212635 |
| hbm-miR-B2RC     | 8.609455  |
| hsa-miR-1305     | 8.591639  |
| hsa-miR-3652     | 8.543315  |
| hsv1-miR-H7*     | 8.509319  |
| hsa-miR-24       | 8.476858  |
| hsa-miR-1229     | 8.470226  |
| hsa-miR-671-5p   | 8.44429   |
| hsa-miR-1290     | 8.410376  |

|                   |           |
|-------------------|-----------|
| hsa-miR-146a      | 8.379499  |
| hsa-miR-142-3p    | 8.331952  |
| hsa-let-7i        | 8.313329  |
| hsa-miR-3648      | 8.303959  |
| hsa-miR-100       | 8.270742  |
| hsa-miR-1181      | 8.131459  |
| hsa-miR-34a       | 8.099792  |
| hsa-miR-125a-3p   | 8.075232  |
| hsa-miR-601       | 8.04512   |
| hsa-miR-3911      | 8.018745  |
| hsa-miR-3937      | 7.984123  |
| hsa-miR-874       | 7.9371705 |
| hsa-miR-342-3p    | 7.926705  |
| hsa-let-7g        | 7.915552  |
| hsa-miR-765       | 7.887698  |
| hsa-miR-345       | 7.865498  |
| hsa-miR-150       | 7.860368  |
| hsa-miR-2276      | 7.8568196 |
| hsa-miR-1260b     | 7.8215027 |
| hsa-miR-3131      | 7.8041406 |
| hsa-miR-29b       | 7.7976923 |
| hsa-miR-3156      | 7.771739  |
| hsa-miR-15b       | 7.7524476 |
| hsa-miR-1226*     | 7.735523  |
| hsa-miR-3610      | 7.7213335 |
| hsa-miR-3945      | 7.68521   |
| ebv-miR-BART19-3p | 7.649603  |
| hsa-miR-320a      | 7.625454  |
| hsa-miR-4284      | 7.59321   |
| hsa-miR-320b      | 7.587061  |
| hsa-miR-1280      | 7.5694084 |
| hsa-miR-139-3p    | 7.553729  |
| hsa-miR-3137      | 7.52622   |
| hsa-miR-513b      | 7.509719  |
| hsa-miR-574-5p    | 7.4982557 |
| hsa-miR-3127      | 7.492097  |
| hsa-miR-3125      | 7.4617014 |
| hsa-miR-198       | 7.4252114 |
| hsa-miR-548q      | 7.3945894 |
| hsa-miR-557       | 7.348301  |
| hsa-miR-320d      | 7.330092  |
| hsa-miR-370       | 7.320868  |

|                 |           |
|-----------------|-----------|
| hsa-miR-4306    | 7.26297   |
| hsa-miR-622     | 7.2514753 |
| hsa-miR-1183    | 7.2419906 |
| hsa-miR-15a     | 7.210106  |
| hsa-miR-199a-3p | 7.1898584 |
| hsa-miR-3917    | 7.1727705 |
| hsa-miR-1288    | 7.158868  |
| hsa-miR-19b     | 7.1449785 |
| hsa-miR-320e    | 7.1105127 |
| hsa-miR-3692*   | 7.1010222 |
| hsa-miR-3194    | 7.0708694 |
| hsa-miR-371-5p  | 7.024727  |
| hsa-let-7d      | 6.9686575 |
| hsa-miR-324-3p  | 6.96316   |
| hiv1-miR-H1     | 6.940594  |
| hcmv-miR-US4    | 6.9288077 |
| hsa-miR-1182    | 6.9163275 |
| hsa-miR-4257    | 6.9024043 |
| hsa-miR-103     | 6.8786325 |
| hsa-miR-29c     | 6.877446  |
| hsa-miR-520b    | 6.8434925 |
| hsv1-miR-H8     | 6.825449  |
| kshv-miR-K12-5* | 6.792757  |
| hsa-miR-27b     | 6.7865763 |
| hsa-miR-193b*   | 6.7807984 |
| hsa-miR-25      | 6.7573423 |
| hsa-miR-26b     | 6.727973  |
| hsa-miR-221     | 6.725342  |
| hsa-miR-149*    | 6.701896  |
| hsa-miR-107     | 6.682109  |
| hsa-miR-202     | 6.650899  |
| hsa-miR-877     | 6.6452036 |
| hsa-miR-1249    | 6.640189  |
| hsa-miR-20a     | 6.6283836 |
| hsa-miR-564     | 6.5982594 |
| hsa-miR-4322    | 6.5616736 |
| hsa-miR-513c    | 6.5305376 |
| hsa-miR-3682    | 6.525962  |
| hsa-miR-1973    | 6.5121965 |
| hsa-let-7c      | 6.5089855 |
| hsa-miR-1228    | 6.4941483 |
| hsa-miR-181a    | 6.4804735 |
| hsa-miR-887     | 6.464864  |

|                  |           |
|------------------|-----------|
| hsa-miR-1274a    | 6.445038  |
| hsa-miR-623      | 6.4438314 |
| hsa-miR-3621     | 6.4202967 |
| hsa-miR-1260     | 6.3744287 |
| hsa-miR-629*     | 6.3666544 |
| hsa-miR-23b      | 6.3469987 |
| hsa-miR-4314     | 6.2705975 |
| hsv1-miR-H16     | 6.259321  |
| hsa-miR-26a      | 6.246234  |
| hsa-let-7e       | 6.216729  |
| ebv-miR-BART7    | 6.206436  |
| hsa-miR-92a      | 6.192953  |
| hsa-miR-3907     | 6.183742  |
| hsv1-miR-H1      | 6.171818  |
| hsa-miR-498      | 6.164486  |
| hsa-miR-365      | 6.146815  |
| hsa-miR-892b     | 6.1217833 |
| hsa-miR-769-3p   | 6.1114383 |
| hsa-miR-4253     | 6.088073  |
| hsa-miR-3132     | 6.076616  |
| hsa-miR-155      | 6.0633006 |
| hsa-miR-4304     | 6.0333924 |
| hsa-miR-516a-5p  | 6.0256453 |
| hsa-miR-520e     | 6.021188  |
| hsa-miR-423-5p   | 5.980315  |
| hsa-miR-936      | 5.9676275 |
| hsa-miR-3190     | 5.961391  |
| hsa-miR-106b     | 5.9278445 |
| hsa-miR-145      | 5.918894  |
| hsa-miR-486-5p   | 5.914959  |
| hsa-miR-30b      | 5.9035883 |
| hsa-miR-500a     | 5.890527  |
| hsa-miR-514b-5p  | 5.889735  |
| hsa-miR-659      | 5.8651314 |
| hsa-miR-3646     | 5.8547306 |
| hsa-miR-1225-3p  | 5.8484735 |
| hsa-miR-30e      | 5.8215866 |
| hsa-miR-30c-1*   | 5.8180933 |
| hsa-miR-3622a-5p | 5.7951317 |
| hsa-miR-199a-5p  | 5.7924604 |
| hsa-miR-584      | 5.783854  |
| hsa-miR-30d      | 5.776058  |
| hsa-miR-19a      | 5.7480183 |

|                  |           |
|------------------|-----------|
| hsa-miR-3202     | 5.7275953 |
| hsa-miR-1299     | 5.697763  |
| hsa-miR-378      | 5.6829734 |
| hsv-miR-B20      | 5.6766653 |
| hsa-miR-760      | 5.656721  |
| hsa-miR-3934     | 5.650096  |
| hsa-miR-425      | 5.648071  |
| hsa-miR-17       | 5.6313367 |
| hsv2-miR-H9-5p   | 5.6244364 |
| hsa-miR-130a     | 5.6228228 |
| hsv1-miR-H14-3p  | 5.6060157 |
| hsa-miR-144      | 5.588946  |
| hsa-miR-1273e    | 5.5699577 |
| hsa-miR-1972     | 5.56094   |
| kshv-miR-K12-8*  | 5.5450654 |
| hsa-miR-3713     | 5.5366144 |
| hsv2-miR-H2      | 5.524804  |
| hsa-miR-378b     | 5.5095763 |
| hsa-miR-126      | 5.492161  |
| hsa-miR-3620     | 5.470476  |
| hsa-miR-4294     | 5.4573026 |
| hsv-miR-B4       | 5.4477577 |
| hsa-miR-10b*     | 5.4315786 |
| hsa-miR-1234     | 5.4243937 |
| hsa-miR-193a-5p  | 5.406678  |
| hsa-miR-424      | 5.398101  |
| hsa-miR-331-3p   | 5.3856583 |
| hsv1-miR-H15     | 5.383128  |
| bkv-miR-B1-5p    | 5.36899   |
| hsa-miR-30a      | 5.367517  |
| hsa-miR-187*     | 5.333323  |
| hsa-miR-3154     | 5.30785   |
| hsa-miR-142-5p   | 5.2978783 |
| hsa-miR-1469     | 5.2968225 |
| kshv-miR-K12-10b | 5.2911406 |
| hsa-miR-3161     | 5.263558  |
| hsa-miR-93       | 5.257251  |
| hsa-miR-1306     | 5.2527676 |
| hsa-miR-662      | 5.2386284 |
| hsa-miR-490-5p   | 5.2133293 |
| hsa-miR-501-5p   | 5.206587  |
| hsa-miR-374a     | 5.159381  |
| hsa-miR-422a     | 5.15327   |



|                  |           |
|------------------|-----------|
| hsa-miR-185      | 5.139147  |
| hsa-miR-4282     | 5.1300755 |
| hsa-miR-23a*     | 5.1223097 |
| hsa-miR-148a     | 5.1093135 |
| hsa-miR-1208     | 5.095356  |
| hsa-miR-214      | 5.0789213 |
| hsa-miR-3187     | 5.066514  |
| hsa-miR-151-5p   | 5.061845  |
| hsa-miR-125b-2*  | 5.0501995 |
| hsa-miR-1323     | 5.02599   |
| hsa-miR-210      | 4.99925   |
| hsa-miR-1295     | 4.990408  |
| hsa-miR-3622b-5p | 4.986885  |
| hsa-miR-583      | 4.9794745 |
| hsa-miR-3659     | 4.975812  |
| hsa-miR-298      | 4.9730263 |
| hsa-miR-711      | 4.9592266 |
| hsa-miR-610      | 4.9569855 |
| hsa-miR-30c      | 4.9361496 |
| hsa-miR-181b     | 4.931223  |
| hsa-miR-1238     | 4.924039  |
| hsa-miR-1273c    | 4.9215536 |
| hsa-miR-140-3p   | 4.8835716 |
| hsa-miR-3654     | 4.8668785 |
| hsa-miR-3926     | 4.85363   |
| hsa-miR-374b     | 4.8428397 |
| hsa-miR-3925     | 4.840644  |
| hsa-miR-4259     | 4.8332644 |
| hsa-miR-605      | 4.8253736 |
| hsa-miR-193b     | 4.821718  |
| hsa-miR-3147     | 4.797043  |
| hsa-miR-373*     | 4.7802134 |
| hsa-miR-3150b    | 4.776926  |
| hsa-miR-512-3p   | 4.7693586 |
| hsa-miR-125a-5p  | 4.7462516 |
| hsa-miR-3605-5p  | 4.73293   |
| hsa-miR-361-5p   | 4.723005  |
| hsa-miR-617      | 4.7151737 |
| hsa-miR-212      | 4.7085743 |
| hsa-miR-30c-2*   | 4.706713  |
| hsa-miR-197      | 4.68123   |
| hsa-miR-99b*     | 4.669672  |
| hsa-miR-376c     | 4.652832  |

|                  |           |
|------------------|-----------|
| hsa-miR-191*     | 4.62821   |
| hsa-miR-146b-5p  | 4.6192274 |
| hsa-miR-3180-3p  | 4.605529  |
| hsa-miR-3666     | 4.5949802 |
| hsa-miR-140-5p   | 4.5826044 |
| hsv2-miR-H3      | 4.5705557 |
| hsa-miR-3689a-5p | 4.5536947 |
| hsv1-miR-H3*     | 4.53466   |
| hsa-miR-3617     | 4.5257034 |
| hsa-miR-3200-5p  | 4.5151615 |
| hsv1-miR-H2*     | 4.497773  |
| hsa-miR-296-5p   | 4.482547  |
| hsa-miR-99b      | 4.478032  |
| hsa-miR-101      | 4.4575768 |
| hsa-miR-130b     | 4.4354644 |
| hsa-miR-4313     | 4.410917  |
| hsa-miR-3660     | 4.3924875 |
| hsa-miR-4269     | 4.384628  |
| hsa-miR-1254     | 4.3772244 |
| hsa-miR-3189     | 4.360774  |
| hsa-miR-339-3p   | 4.3579097 |
| hcmv-miR-US33-5p | 4.352947  |
| hsa-miR-99a      | 4.335063  |
| hsa-miR-602      | 4.320478  |
| hsa-miR-636      | 4.302271  |
| hsa-miR-1287     | 4.2796936 |
| hsa-miR-3185     | 4.259828  |
| hsa-miR-3182     | 4.246178  |
| hsa-miR-665      | 4.2421007 |
| hsa-miR-138-2*   | 4.2405    |
| hsa-miR-1281     | 4.225437  |
| hsa-miR-766      | 4.2144012 |
| hsa-miR-708      | 4.2044234 |
| hsa-miR-3680*    | 4.1917934 |
| hsa-miR-132      | 4.186405  |
| hsa-miR-3676     | 4.1730585 |
| hsa-miR-148b     | 4.163746  |
| hsa-miR-4251     | 4.156004  |
| hsa-miR-20b      | 4.1442237 |
| hsa-miR-196a     | 4.1293497 |
| hsa-miR-425*     | 4.1112337 |
| hsa-miR-590-5p   | 4.0975156 |
| hsv1-miR-H3      | 4.092599  |

|                  |           |
|------------------|-----------|
| hsa-miR-550a     | 4.08558   |
| hsa-miR-3923     | 4.056779  |
| hsa-miR-193a-3p  | 4.0350733 |
| hsa-miR-513a-3p  | 4.001229  |
| hsa-miR-614      | 3.9935117 |
| hsa-miR-1307     | 3.9724243 |
| hsa-miR-877*     | 3.9487581 |
| hsa-miR-770-5p   | 3.9405165 |
| hsa-miR-660      | 3.9336748 |
| hsa-miR-1237     | 3.9151406 |
| hsa-miR-98       | 3.894874  |
| hsa-miR-28-3p    | 3.8910751 |
| hsa-miR-1825     | 3.879572  |
| hsa-miR-196b     | 3.8660698 |
| hsa-miR-663b     | 3.8615017 |
| hsa-miR-302c*    | 3.8569658 |
| ebv-miR-BHRF1-1  | 3.844483  |
| hsa-miR-33b*     | 3.8391492 |
| hsa-miR-3177     | 3.8196063 |
| hsa-miR-222      | 3.81109   |
| hsa-miR-1303     | 3.7894883 |
| hsa-miR-3938     | 3.7735357 |
| hsa-miR-1273d    | 3.764999  |
| hsa-miR-526b     | 3.7525933 |
| hsa-miR-138      | 3.748384  |
| hsa-miR-377      | 3.7403884 |
| hsa-miR-376a     | 3.7331734 |
| hsa-miR-10b      | 3.7145371 |
| hsa-miR-184      | 3.710299  |
| hsa-miR-4260     | 3.7029305 |
| hsa-miR-3197     | 3.673366  |
| hsa-miR-3663-5p  | 3.6415882 |
| hsa-miR-596      | 3.632085  |
| hsa-miR-143      | 3.629878  |
| hsa-miR-542-5p   | 3.6185164 |
| hsa-miR-654-5p   | 3.6120281 |
| hsa-miR-509-3-5p | 3.6052294 |
| hsa-miR-1180     | 3.5953264 |
| hsa-miR-151-3p   | 3.5686638 |
| hsa-miR-128      | 3.5363293 |
| hsa-miR-34b*     | 3.525735  |
| hsa-miR-631      | 3.5022857 |
| hsa-miR-186      | 3.4942274 |

|                 |           |
|-----------------|-----------|
| hsa-miR-378c    | 3.4898176 |
| hsa-miR-365*    | 3.4818244 |
| hsa-miR-205     | 3.4575315 |
| kshv-miR-K12-8  | 3.4413679 |
| hsa-miR-1       | 3.421696  |
| hsa-miR-4261    | 3.4072268 |
| hsa-miR-340     | 3.403561  |
| hsa-miR-4311    | 3.3917136 |
| hsa-miR-3170    | 3.3854876 |
| hsa-miR-1911    | 3.358883  |
| hsa-miR-574-3p  | 3.3354795 |
| hsa-miR-3651    | 3.3352032 |
| hsa-miR-127-3p  | 3.3319952 |
| hsa-miR-30b*    | 3.315051  |
| hsa-miR-1285    | 3.2940593 |
| hsa-miR-338-3p  | 3.2902296 |
| hsa-miR-338-5p  | 3.2789385 |
| hsa-miR-664*    | 3.2303243 |
| hsa-miR-152     | 3.2204356 |
| hsa-miR-1261    | 3.1965456 |
| hsa-miR-1321    | 3.1883433 |
| hsa-miR-652     | 3.1404533 |
| hsa-miR-4323    | 3.1318564 |
| hsa-miR-3178    | 3.1241574 |
| hsa-miR-324-5p  | 3.118023  |
| hsa-miR-199b-5p | 3.1063182 |
| hsa-miR-661     | 3.0946808 |
| hsa-miR-21*     | 3.0855656 |
| hsa-miR-10a     | 3.0808969 |
| hsa-miR-505     | 3.0599911 |
| hsa-miR-28-5p   | 3.049326  |
| hsa-miR-3653    | 3.044369  |
| hsa-miR-566     | 3.0398333 |
| hsa-miR-516b    | 3.0262516 |
| hsa-miR-133b    | 2.9991283 |
| hsa-miR-3163    | 2.992115  |
| hsa-miR-492     | 2.9880893 |
| hsa-miR-424*    | 2.9743433 |
| hsa-miR-933     | 2.9558759 |
| hsa-miR-2277-3p | 2.9057229 |
| hsa-miR-4317    | 2.8924837 |
| hsa-miR-4324    | 2.8793259 |
| hsa-miR-532-5p  | 2.8593621 |

|                  |           |
|------------------|-----------|
| hsa-miR-301a     | 2.8487623 |
| hsa-miR-186*     | 2.837029  |
| hsa-miR-192      | 2.8177302 |
| hsa-miR-129-5p   | 2.8019385 |
| hsa-miR-1915*    | 2.7918816 |
| hsa-miR-409-3p   | 2.7807622 |
| hsa-miR-648      | 2.767327  |
| hsa-miR-361-3p   | 2.7650313 |
| hsa-miR-3174     | 2.746513  |
| hsa-miR-658      | 2.7367568 |
| hsa-miR-487b     | 2.7329187 |
| hsa-miR-371-3p   | 2.7091498 |
| hsa-miR-342-5p   | 2.6909904 |
| hsa-miR-508-5p   | 2.6792846 |
| hsa-miR-3124     | 2.6667027 |
| hsa-miR-628-5p   | 2.6522994 |
| hsa-miR-195      | 2.6393867 |
| hsa-miR-500a*    | 2.6313558 |
| hsa-miR-3679-3p  | 2.6140695 |
| hsa-miR-519e*    | 2.5904584 |
| hsa-miR-432      | 2.548689  |
| hsa-miR-509-5p   | 2.5264719 |
| hsa-miR-3915     | 2.4814987 |
| hsa-miR-3181     | 2.4773948 |
| hsa-miR-362-3p   | 2.4514635 |
| jcv-miR-J1-5p    | 2.4285305 |
| hsa-miR-1243     | 2.3974748 |
| hsa-miR-3180-5p  | 2.3835335 |
| hsa-miR-136      | 2.36044   |
| hsa-miR-551b     | 2.3465629 |
| hsa-miR-495      | 2.3232994 |
| hsa-miR-501-3p   | 2.1862235 |
| hsa-miR-34c-3p   | 2.154354  |
| hsa-miR-650      | 2.1348248 |
| hsa-miR-934      | 2.1268258 |
| hcmv-miR-UL36    | 2.1132197 |
| hsa-miR-632      | 2.0501277 |
| hsa-miR-200a*    | 2.0045772 |
| ebv-miR-BART16   | 1.8961444 |
| hcmv-miR-US25-1* | 1.889236  |
| hsa-miR-639      | 1.8706405 |
| hsa-miR-551b*    | 1.8673565 |
| hsa-miR-194*     | 1.7747277 |

|                 |           |
|-----------------|-----------|
| hsa-miR-125b-1* | 1.7510183 |
|-----------------|-----------|
